# Supplementary material
Source: PubMed Central journal article supplement (PMC7440674)
Supplement: jmm-69-52-s001.pdf [file jmm-69-52-s001.pdf]

## Supplementary Materials

**Supplemental Figure 1.** Comparison of detection sensitivity of rapid AST prototype and conventional optical density instrumentation. A culture of wild type *E. coli* (ATCC 295922) at a concentration of  $1 \times 10^3$  CFU/ml was incubated for 6.5 hours and measured on both instruments at 30 min intervals. To display the data on the same plot, each time point was calculated as the “change in measured concentration” by dividing by the first time point measurement ( $T_0$ ). Results demonstrate the superior sensitivity of the rapid AST device using discrete counting compared to traditional bulk measurements such as optical density, where a single doubling time of 30 minutes is enough to induce a detectable change, compared to at least 5 hours using  $OD_{600}$ .

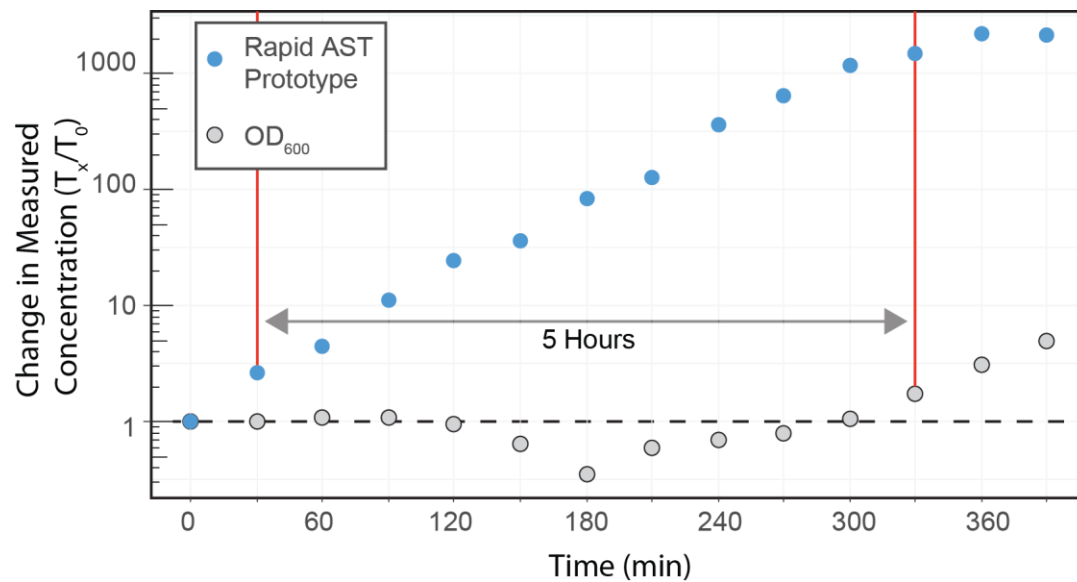

**Supplemental Table 1.** CFU plate verification data for bacterial dilution curve.

| Replicate | Expected Concentrations (CFU/mL) | Actual Concentrations (CFU/mL) |
|-----------|----------------------------------|--------------------------------|
|           |                                  |                                |
| A         | $1 \times 10^2$                  | 523.33                         |
| B         | $1 \times 10^2$                  | 416.67                         |
| C         | $1 \times 10^2$                  | 460.00                         |
| average   |                                  | 466.67                         |
|           |                                  |                                |
| A         | $1 \times 10^3$                  | 4190.00                        |
| B         | $1 \times 10^3$                  | 2523.33                        |
| C         | $1 \times 10^3$                  | 3120.00                        |
| average   |                                  | 3277.78                        |
|           |                                  |                                |
| A         | $1 \times 10^4$                  | 21033.33                       |
| B         | $1 \times 10^4$                  | 25166.67                       |
| C         | $1 \times 10^4$                  | 36300.00                       |
| average   |                                  | 27500.00                       |
|           |                                  |                                |
| A         | $1 \times 10^5$                  | 223000.00                      |
| B         | $1 \times 10^5$                  | 212000.00                      |
| C         | $1 \times 10^5$                  | 318666.67                      |
| average   |                                  | 251222.22                      |
|           |                                  |                                |
| A         | $1 \times 10^6$                  | 2343333.33                     |
| B         | $1 \times 10^6$                  | 1930000.00                     |
| C         | $1 \times 10^6$                  | 4030000.00                     |
| average   |                                  | 2767777.78                     |

**Supplemental Table 2: CFU Plate Verification Data for Contrived Samples (AST method validation)**

| Day 1 CFU Data: Back Calculations for Actual Concentration in Growth Medium |        |        |    |         |         |   |
|-----------------------------------------------------------------------------|--------|--------|----|---------|---------|---|
|                                                                             | T0     | T1     |    | T2      | T3      |   |
| WT <i>E. coli</i>                                                           | 56800  | 67100  |    | 390000  | 5700000 |   |
| WT <i>E. coli</i> + Kanamycin                                               | 15700  | 0      |    | 0       | 0       | * |
| <i>E. coli</i> KR                                                           | 15900  | 38500  |    | 630000  | 2600000 |   |
| <i>E. coli</i> KR + Kanamycin                                               | 35700  | 18400  |    | 510000  | 1350000 |   |
|                                                                             |        |        |    |         |         |   |
| Day 2 CFU Data: Back Calculations for Actual Concentration in Growth Medium |        |        |    |         |         |   |
|                                                                             | T0     | T1     |    | T2      | T3      |   |
| WT <i>E. coli</i>                                                           | 18000  | 161000 |    | 1700000 | 6800000 |   |
| WT <i>E. coli</i> + Kanamycin                                               | 26400  | 0      |    | 0       | 0       | * |
| <i>E. coli</i> KR                                                           | 47500  | 51000  |    | 259000  | 3320000 |   |
| <i>E. coli</i> KR + Kanamycin                                               | 74800  | 57000  |    | 169000  | 1610000 |   |
|                                                                             |        |        |    |         |         |   |
| Day 3 CFU Data: Back Calculations for Actual Concentration in Growth Medium |        |        |    |         |         |   |
|                                                                             | T0     | T1     |    | T2      | T3      |   |
| WT <i>E. coli</i>                                                           | 655000 | 141000 | ** | 1930000 | 7720000 |   |
| WT <i>E. coli</i> + Kanamycin                                               | 457000 | 0      |    | 0       | 0       | * |
| <i>E. coli</i> KR                                                           | 319000 | 365000 |    | 1070000 | 2550000 |   |
| <i>E. coli</i> KR + Kanamycin                                               | 175000 | 431000 |    | 1000000 | 2890000 |   |

\* for T1 to T3, no growth, assume remaining CFU/ml same as T0 concentration

\*\*Note: T1 CFU plate showed lower colony numbers than expected/plating error (evident by next two time points)

**Supplemental Table 3:** Individual data comparing rapid and conventional AST results. Drug codes: AX = amoxicillin-clavulanate, CP = ciprofloxacin, CZ = ceftazidime, FF = fosfomycin, NF = nitrofurantoin. R = “resistant”, S = “sensitive”.

| Sample Number | Patient ID | Drug | Rapid AST | Conventional AST | Species                          |
|---------------|------------|------|-----------|------------------|----------------------------------|
| 1             | 0001       | AX   | R         | R                | <i>E. coli</i>                   |
| 2             | 0001       | CP   | S         | S                | <i>E. coli</i>                   |
| 3             | 0001       | CZ   | S         | S                | <i>E. coli</i>                   |
| 4             | 0001       | FF   | S         | S                | <i>E. coli</i>                   |
| 5             | 0001       | NF   | R         | R                | <i>E. coli</i>                   |
| 6             | 0002       | CP   | R         | R                | <i>S. haemolyticus</i>           |
| 7             | 0002       | FF   | R         | R                | <i>S. haemolyticus</i>           |
| 8             | 0003       | AX   | R         | R                | <i>E. coli</i>                   |
| 9             | 0003       | CP   | R         | R                | <i>E. coli</i>                   |
| 10            | 0003       | CZ   | R         | R                | <i>E. coli</i>                   |
| 11            | 0003       | FF   | S         | S                | <i>E. coli</i>                   |
| 12            | 0003       | NF   | S         | S                | <i>E. coli</i>                   |
| 13            | 0004       | AX   | R         | R                | <i>K. pneumoniae</i>             |
| 14            | 0004       | CP   | S         | R                | <i>K. pneumoniae</i>             |
| 15            | 0004       | CZ   | R         | R                | <i>K. pneumoniae</i>             |
| 16            | 0004       | FF   | R         | R                | <i>K. pneumoniae</i>             |
| 17            | 0005       | CP   | R         | R                | <i>P. aeruginosa</i>             |
| 18            | 0005       | CZ   | R         | R                | <i>P. aeruginosa</i>             |
| 19            | 0005       | FF   | R         | R                | <i>P. aeruginosa</i>             |
| 20            | 0006       | AX   | S         | S                | <i>E. faecalis/E. coli</i>       |
| 21            | 0006       | CZ   | S         | S                | <i>E. faecalis/E. coli</i>       |
| 22            | 0006       | FF   | S         | S                | <i>E. faecalis/E. coli</i>       |
| 23            | 0007       | AX   | R         | R                | <i>E. coli</i>                   |
| 24            | 0007       | CP   | R         | R                | <i>E. coli</i>                   |
| 25            | 0007       | CZ   | S         | S                | <i>E. coli</i>                   |
| 26            | 0007       | FF   | S         | S                | <i>E. coli</i>                   |
| 27            | 0007       | NF   | S         | S                | <i>E. coli</i>                   |
| 28            | 0008       | AX   | R         | S                | <i>K. pneumoniae/E. faecalis</i> |
| 29            | 0008       | CP   | S         | S                | <i>K. pneumoniae/E. faecalis</i> |
| 30            | 0008       | CZ   | R         | S                | <i>K. pneumoniae/E. faecalis</i> |
| 31            | 0008       | FF   | S         | S                | <i>K. pneumoniae/E. faecalis</i> |
| 32            | 0009       | AX   | S         | S                | <i>E. coli</i>                   |
| 33            | 0009       | CP   | S         | S                | <i>E. coli</i>                   |
| 34            | 0009       | CZ   | S         | S                | <i>E. coli</i>                   |
| 35            | 0009       | FF   | S         | S                | <i>E. coli</i>                   |
| 36            | 0009       | NF   | S         | S                | <i>E. coli</i>                   |
| 37            | 0010       | AX   | S         | S                | <i>E. coli</i>                   |
| 38            | 0010       | CP   | S         | S                | <i>E. coli</i>                   |
| 39            | 0010       | CZ   | R         | S                | <i>E. coli</i>                   |
| 40            | 0010       | FF   | S         | S                | <i>E. coli</i>                   |
| 41            | 0010       | NF   | S         | S                | <i>E. coli</i>                   |
| 42            | 0011       | AX   | R         | R                | <i>E. coli</i>                   |
| 43            | 0011       | CP   | R         | R                | <i>E. coli</i>                   |
| 44            | 0011       | CZ   | R         | R                | <i>E. coli</i>                   |

|    |      |    |   |   |                            |
|----|------|----|---|---|----------------------------|
| 45 | 0011 | FF | S | S | <i>E. coli</i>             |
| 46 | 0011 | NF | S | S | <i>E. coli</i>             |
| 47 | 0012 | AX | R | S | <i>E. coli/E. faecalis</i> |
| 48 | 0012 | CP | S | S | <i>E. coli/E. faecalis</i> |
| 49 | 0012 | CZ | S | S | <i>E. coli/E. faecalis</i> |
| 50 | 0012 | FF | S | S | <i>E. coli/E. faecalis</i> |
| 51 | 0012 | NF | S | S | <i>E. coli/E. faecalis</i> |
| 52 | 0013 | NF | S | S | <i>E. faecalis</i>         |
| 53 | 0014 | AX | S | S | <i>E. coli</i>             |
| 54 | 0014 | CP | S | S | <i>E. coli</i>             |
| 55 | 0014 | CZ | S | S | <i>E. coli</i>             |
| 56 | 0014 | FF | S | S | <i>E. coli</i>             |
| 57 | 0014 | NF | S | S | <i>E. coli</i>             |
| 58 | 0015 | CP | S | S | <i>S. haemolyticus</i>     |
| 59 | 0015 | FF | S | R | <i>S. haemolyticus</i>     |
| 60 | 0016 | AX | R | R | <i>K. pneumoniae</i>       |
| 61 | 0016 | CP | R | R | <i>K. pneumoniae</i>       |
| 62 | 0016 | CZ | R | R | <i>K. pneumoniae</i>       |
| 63 | 0016 | FF | S | S | <i>K. pneumoniae</i>       |
| 64 | 0017 | AX | S | S | <i>E. coli</i>             |
| 65 | 0017 | CP | S | S | <i>E. coli</i>             |
| 66 | 0017 | CZ | S | S | <i>E. coli</i>             |
| 67 | 0017 | FF | S | S | <i>E. coli</i>             |
| 68 | 0017 | NF | S | S | <i>E. coli</i>             |
| 69 | 0018 | AX | S | S | <i>E. coli</i>             |
| 70 | 0018 | CP | S | S | <i>E. coli</i>             |
| 71 | 0018 | CZ | S | S | <i>E. coli</i>             |
| 72 | 0018 | FF | S | S | <i>E. coli</i>             |
| 73 | 0018 | NF | S | S | <i>E. coli</i>             |
| 74 | 0019 | AX | S | S | <i>K. pneumoniae</i>       |
| 75 | 0019 | CP | S | S | <i>K. pneumoniae</i>       |
| 76 | 0019 | CZ | S | S | <i>K. pneumoniae</i>       |
| 77 | 0019 | FF | S | R | <i>K. pneumoniae</i>       |
| 78 | 0020 | AX | R | R | <i>E. coli</i>             |
| 79 | 0020 | CP | R | R | <i>E. coli</i>             |
| 80 | 0020 | CZ | R | R | <i>E. coli</i>             |
| 81 | 0020 | NF | S | S | <i>E. coli</i>             |
| 82 | 0021 | AX | S | S | <i>E. coli</i>             |
| 83 | 0021 | CP | S | S | <i>E. coli</i>             |
| 84 | 0021 | CZ | R | S | <i>E. coli</i>             |
| 85 | 0021 | FF | S | S | <i>E. coli</i>             |
| 86 | 0021 | NF | S | S | <i>E. coli</i>             |
| 87 | 0022 | AX | S | S | <i>E.coli</i>              |
| 88 | 0022 | CP | S | S | <i>E. coli</i>             |
| 89 | 0022 | CZ | S | S | <i>E. coli</i>             |
| 90 | 0022 | FF | S | S | <i>E. coli</i>             |
| 91 | 0022 | NF | S | S | <i>E. coli</i>             |
| 92 | 0023 | AX | S | S | <i>E. coli/E. faecalis</i> |
| 93 | 0023 | CZ | S | S | <i>E. coli/E. faecalis</i> |
| 94 | 0023 | FF | S | S | <i>E. coli/E. faecalis</i> |

|           |      |    |   |   |                    |
|-----------|------|----|---|---|--------------------|
| <b>95</b> | 0024 | CP | S | S | <i>E. faecalis</i> |
| <b>96</b> | 0024 | NF | S | S | <i>E. faecalis</i> |
| <b>97</b> | 0025 | CP | R | S | <i>E. faecium</i>  |
